# Supplementary material
Source: MDPI journal article supplement (https://www.mdpi.com/2075-163X/13/4/487)
Supplement: s1 [file s1]

# Development of CO<sub>2</sub> Absorption Using Blended Alkanolamine Absorbents for Multicycle Integrated Absorption–Mineralization

Chanakarn Thamsiriprideeporn \* and Suekane Tetsuya

Department of Mechanical Engineering, School of Energy Science and Technology, Tokyo Institute of Technology 2 Chome-12-1 Ookayama, Tokyo 152-8550, Japan

\* Correspondence: chanakarn.tham@gmail.com

**Table S1.** Composite index of blended alkanolamine absorbent in multicycle IAM.

$$\begin{aligned} \text{Appropriate blended absorbent} = & (W_1 \times \text{CO}_2 \text{ absorption factor}) + \\ & (W_2 \times \text{Conversion factor}) + (W_3 \times \text{Degradation factor}) \\ & + (W_4 \times \text{Toxic factor}) + (W_5 \times \text{Cost factor}) \end{aligned} \quad (9)$$

|                      | CO <sub>2</sub> absorption factor | Degradation factor | Conversion factor | Toxic factor | Cost factor | Index |
|----------------------|-----------------------------------|--------------------|-------------------|--------------|-------------|-------|
| 5wt.%MEA             | 0.668                             | 0.922              | 0.594             | 0.014        | 0.713       | 0.463 |
| 5wt.%DEA + 5wt.%MEA  | 0.326                             | 0.789              | 0.725             | 0.014        | 0.68        | 0.477 |
| 10wt.%DEA + 5wt.%MEA | 0.226                             | 0.778              | 0.742             | 0.013        | 0.669       | 0.466 |
| 15wt.%DEA + 5wt.%MEA | 0.226                             | 0.752              | 0.759             | 0.013        | 0.663       | 0.48  |
| 5wt.%TEA + 5wt.%MEA  | 0.361                             | 0.763              | 0.614             | 0.017        | 0.856       | 0.44  |
| 10wt.%TEA + 5wt.%MEA | 0.191                             | 0.675              | 0.706             | 0.018        | 0.904       | 0.455 |
| 15wt.%TEA + 5wt.%MEA | 0.15                              | 0.702              | 0.805             | 0.019        | 0.928       | 0.466 |
| 5wt.%AMP + 5wt.%MEA  | 0.351                             | 0.382              | 0.659             | 0.015        | 0.756       | 0.576 |
| 10wt.%AMP + 5wt.%MEA | 0.224                             | 0.431              | 0.799             | 0.015        | 0.77        | 0.577 |
| 15wt.%AMP + 5wt.%MEA | 0.201                             | 0.451              | 0.871             | 0.016        | 0.778       | 0.587 |

where:

- (1) The CO<sub>2</sub> absorption factor represents the fraction of the blended alkanolamine absorbent's experimental CO<sub>2</sub> absorption capacity to its nominal CO<sub>2</sub> absorption capacity. The nominal CO<sub>2</sub> absorption capacity is 720 g·CO<sub>2</sub>/kg.absorbent at very low concentrations [48].
- (2) The degradation factor accounts for the degradation of the blended alkanolamine solution over time due to the fact of chemical reactions and impurities [52–54] and can be estimated using Equation (7).
- (3) The conversion factor represents the fraction of CO<sub>2</sub> that is converted into a stable carbonate after absorption [51] and can be estimated using Equation (8).
- (4) The toxic factor indicates the environmental impact of the amine solution during production and disposal, which is measured by the lethal dose 50 (LD50). The LD50 value is the dose of a substance or material that would cause the death of 50% of the exposed population within a specific time period. For instance, the acute oral LD50 values for MEA, DEA, TEA, and AMP are 2.74, 1.82, 2.34, and 2.15 g/kg, respectively [59,60].
- (5) Cost factor represents the economic feasibility of using the amine solution. The cost factor is calculated based on the market price of the amine components, which include MEA, DEA, TEA, and AMP. The current market prices of these amine components are reported as 0.71, 0.65, 1, and 0.8 USD/kg [61–63], respectively. By considering the cost factor in the decision-making process, it is possible

---

to choose the most economically viable amine blend for CO<sub>2</sub> capture applications.

6.  $W_1$ ,  $W_2$ ,  $W_3$ ,  $W_4$ , and  $W_5$  are weights assigned to each variable according to their importance in developing multicycle IAM. The conversion and degradation factors are the most important components ( $W_2 = 0.3$  and  $W_3 = 0.3$ ), followed by the CO<sub>2</sub> absorption factor ( $W_1 = 0.2$ ) and then the toxic and cost factors ( $W_4 = 0.1$  and  $W_5 = 0.1$ ), in that order.

These factors range from 0 to 1, with 0 indicating no effect and 1 indicating the greatest effect.

---
